# Supplementary material for: Modeling the rupture of a capillary liquid bridge between a sphere and plane
Source: Royal Society of Chemistry journal article supplement (doi:10.1039/c0sm00497a), 2010-01-01
Supplement: c0sm00497a.pdf [file c0sm00497a.pdf]

## Supplementary Information

# Modeling the rupture of capillary liquid bridge between sphere and plane

Li Yang<sup>ab</sup>, Yusong Tu<sup>abc</sup>, and Haiping Fang<sup>\*ad</sup>

<sup>a</sup> Shanghai Institute of Applied Physics, Chinese Academy of Sciences, P.O. Box 800-204, Shanghai, 201800, China. E-mail: fanghaiping@sinap.ac.cn

<sup>b</sup> Graduate School of the Chinese Academy of Sciences, Beijing, 100080

<sup>c</sup> Institute of Systems Biology, Shanghai University, Shanghai, 200444, China

<sup>d</sup> T-Life Research Center, Department of Physics, Fudan University, Shanghai, 200433, China

## 1. Model

The partial enlarged view of the liquid bridge separation process for Fig. 2 in the main text is shown in Fig. S1.

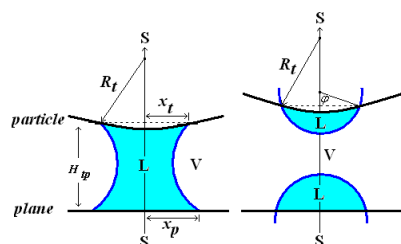

Figure S1. The partial enlarged view of the liquid bridge separation process for Fig. 2.

## 2. Total interfacial energy $W$ of the liquid bridge

The particle-plane system has three phases (S, solid; L, liquid; V, vapor). The liquid bridge total interfacial energy  $W$  can be expressed as follows:

$$\begin{aligned}
 W &= W_{LV} + W_{SL} + W_{SV} \\
 &= \gamma_{LV} A_{LV} + \gamma_{SL} A_{SL} + \gamma_{SV} A_{SV} \\
 &= \gamma_{LV} A_{LV} + (\gamma_{SL-particle} A_{SL-particle} + \gamma_{SV-particle} A_{SV-particle}) \\
 &\quad + (\gamma_{SL-plane} A_{SL-plane} + \gamma_{SV-plane} A_{SV-plane}) \\
 &= \gamma_{LV} A_{LV} + [\gamma_{SL-particle} A_{SL-particle} + \gamma_{SV-particle} (C1 - A_{SL-particle})] \\
 &\quad + [\gamma_{SL-plane} A_{SL-plane} + \gamma_{SV-plane} (C2 - A_{SL-plane})], \tag{S1}
 \end{aligned}$$

where  $\gamma$  is the surface energy,  $A$  represents the interface area,  $C1$  and  $C2$  are arbitrary constants. Following the assumptions in references S1<sup>S1</sup> and S2<sup>S2</sup>

$$C1 = C2 = 0,$$

$W$  can be rewritten into

$$W = \gamma_{LV} A_{LV} + (\gamma_{SL-particle} - \gamma_{SV-particle}) A_{SL-particle} + (\gamma_{SL-plane} - \gamma_{SV-plane}) A_{SL-plane} . \quad (S2)$$

Taking the Young equation of  $\gamma_{LV} \cos \theta = \gamma_{SV} - \gamma_{SL}$  into consideration,  $W$  can be evaluated as a function of the contact angle, surface tension and interface area

$$W = \gamma_{LV} A_{LV} - \gamma_{LV} \cos \theta_t A_{SL-particle} - \gamma_{LV} \cos \theta_p A_{SL-plane} . \quad (S3)$$

The surface areas are given by eqs. (S4), (S5), and (S6) as follows:

$$A_{SL-particle} = 2\pi R_t^2 (1 - \cos \beta) , \quad (S4)$$

$$A_{SL-plane} = \pi x_p^2 , \quad (S5)$$

$$A_{LV} = 2\pi \int_0^{y_i} x(y) \sqrt{1 + [f'(y)]^2} dy . \quad (S6)$$

$f(y)$  is the equation of the meniscus profile in the form of

$$f(y): (x - x_o)^2 + (y - y_o)^2 = r_{tp}^2 . \quad (S7)$$

Substituting eq. (S7) into eq. (S6), the surface area of liquid-vapor  $A_{LV}$  can be rewritten as

$$A_{LV} = 2\pi r_{tp} \{x_o[\pi - (\beta + \theta_t + \theta_p)] - y_i\} . \quad (S8)$$

The total  $W$  is then given by substituting eqs. (S4), (S5) and (S8) into eq. (S3),

$$W = \gamma_{LV} 2\pi r_{tp} \{x_o[\pi - (\beta + \theta_t + \theta_p)] - y_i\} - 2\pi \gamma_{LV} \cos \theta_t R_t^2 (1 - \cos \beta) - \pi \gamma_{LV} \cos \theta_p x_p^2 . \quad (S9)$$

Thus, we arrive at eq. (7) in the main text.

### 3. The interfacial energy $U$ of the two droplets

The interfacial energy of the two droplets is the sum of the energy of the liquid-vapor (LV), liquid-solid (LS) and solid-vapor (SV) interfaces,

$$\begin{aligned} U_{droplet} &= U_{droplet 1} + U_{droplet 2} \\ &= \gamma_{LV-droplet 1} A_{LV-droplet 1} + \gamma_{SL-droplet 1} A_{SL-droplet 1} + \gamma_{SV-droplet 1} A_{SV-droplet 1} \\ &\quad + \gamma_{LV-droplet 2} A_{LV-droplet 2} + \gamma_{SL-droplet 2} A_{SL-droplet 2} + \gamma_{SV-droplet 2} A_{SV-droplet 2} . \end{aligned} \quad (S10)$$

(a) Case  $\theta_t \neq 0^\circ$  and  $\theta_p \neq 0^\circ$

Considering the rupture of a liquid bridge, we assume that the shape of the two droplets is spherical ( $\varphi = \theta_t = \theta_p$ ). The volume of a single droplet is

$$V_{droplet} = \pi R^3 (2 - 3 \cos \theta_t + \cos^3 \theta_t) / 3 . \quad (S11)$$

The interfacial energy of a single droplet is

$$\begin{aligned} U_{droplet1} &= \gamma_{LV} A_{LV} + \gamma_{SL} A_{SL} + \gamma_{SV} A_{SV} \\ &= \gamma_{LV} \pi R^2 (2 - 3 \cos \theta_t + \cos^3 \theta_t) . \end{aligned} \quad (S12)$$

Substituting eq. (S11) into eq. (S12), the expression of  $U_{droplet1}$  becomes

$$U_{droplet1} = \gamma_{LV} [9\pi(2 - 3 \cos \theta_t + \cos^3 \theta_t)]^{1/3} V_{droplet1}^{2/3} . \quad (S13)$$

For convenience, we introduce  $P1$  and  $P2$  by defining

$$P_1 = [9\pi(2 - 3 \cos \theta_t + \cos^3 \theta_t)]^{1/3} , \quad (S14)$$

$$P_2 = [9\pi(2 - 3 \cos \theta_p + \cos^3 \theta_p)]^{1/3} . \quad (S15)$$

Consequently,  $U_{droplet1}$  can be expressed as a function of  $P_1$ ,

$$U_{droplet1} = \gamma_{LV} P_1 V_{droplet1}^{2/3} . \quad (S16)$$

With the identical methods, we can get

$$U = \gamma_{LV} P_1 V_{droplet1}^{2/3} + \gamma_{LV} P_2 V_{droplet2}^{2/3} . \quad (S17)$$

Using the identities  $K = \left(\frac{P_1}{P_2}\right)^3$  and  $V = V_{droplet1} + V_{droplet2}$ ,  $U$  can be finally

rewritten as follows:

$$U = \gamma_{LV} P_2 V^{2/3} (1 + K)^{1/3} . \quad (S18)$$

Thus, we arrive at eq. (8) in the main text.

(b) Case  $\theta_t = \theta_p = 0^\circ$

Using the calculation methods as case (a), we assume that shape of the two droplets is circular cone in the perfect wetting condition ( $\varphi = \beta$ ), and that the height of the droplets are  $H_{tp}/2$ , the final expression for  $U$  is now given by

$$\begin{aligned} U &= \gamma_{LV} A_{LV} + \gamma_{SL} A_{SL} + \gamma_{SV} A_{SV} \\ &= \gamma_{LV} \pi [x_t \sqrt{x_t^2 + H_{tp}^2} - x_t^2 + x_p \sqrt{x_p^2 + H_{tp}^2} - x_p^2] . \end{aligned} \quad (S19)$$

Therefore, we get eq. (9) in the main text.

## References

- S1. X. Pepin, D. Rossetti, S. M. Iveson and S. J. R. Simons, *Journal of Colloid and Interface Science*, 2000, **232**, 289-297.

- S2. P. Lambert, *Capillary forces in microassembly: modeling, simulation, experiments, and case study*, Springer Verlag, 2007.
